# Supplementary material for: Genome-wide investigation of the AP2/ERF superfamily and their expression under salt stress in Chinese willow ( Salix matsudana )
Source: PeerJ journal article supplement (doi:10.7717/peerj.11076), 2021-04-13
Supplement: Figure_S1.pdf [file Figure_S1.pdf]

EVM0040310 .....  
 EVM0040588 .....  
 EVM0009672 .....  
 EVM0023967 .....  
 EVM0056670 .....  
 EVM0019656 ETT .....  
 EVM0036581 .....  
 EVM0015665 .....  
 EVM0035539 .....  
 EVM0003138 .....  
 EVM0047762 .....  
 EVM0011412 .....  
 EVM0044041 .....  
 EVM0001221 .....  
 EVM0042515 .....  
 EVM0040570 .....  
 EVM0012824 .....  
 EVM0008451 .....  
 EVM0006637 .....  
 EVM0025980 .....  
 EVM0000144 .....  
 EVM0033580 .....  
 EVM0043933 .....  
 EVM0050911 .....  
 EVM0035153 .....  
 EVM0056730 .....  
 AT3G20840\_AP2 .....  
 EVM0022735 .....  
 EVM0006689 .....  
 EVM0007616 .....  
 EVM0004062 .....  
 EVM0050425 .....  
 EVM0057600 .....  
 EVM0011531 .....  
 EVM0038265 .....  
 EVM0018397 .....  
 EVM0043533 .....  
 EVM0009993 .....  
 EVM0032803 .....  
 EVM0028655 .....  
 EVM0037464 DTILNFPPLSTYQN .....  
 EVM0027529 .....  
 EVM0036168 .....  
 EVM0008767 .....  
 EVM0052780 .....  
 PtAP2\_21 .....  
 AT4G56920\_AP2 .....  
 EVM0010409 .....  
 EVM0057697 .....  
 EVM0052615 .....  
 EVM0036052 .....  
 EVM0020564 .....  
 EVM0000418 .....  
 EVM0039575 .....  
 EVM0006536 .....  
 EVM0043548 .....  
 EVM0027097 .....  
 EVM0008274 .....  
 EVM0043935 .....  
 EVM0046342 .....  
 EVM0007646 .....  
 EVM0025365 .....  
 EVM0016170 .....  
 EVM0030823 .....  
 EVM0021312 .....  
 EVM0024408 .....  
 EVM0035393 .....  
 EVM0051961 .....  
 EVM0050816 .....  
 EVM0027493 .....  
 PtERFB6\_2 .....  
 EVM0052812 .....  
 EVM0031439 .....  
 PtERFB1\_6 .....  
 EVM0054412 .....  
 EVM0019852 .....  
 EVM0042683 .....  
 EVM0026368 .....  
 EVM0012457 .....  
 EVM0032101 .....  
 EVM0046023 .....  
 EVM0055854 .....  
 EVM0007543 .....  
 EVM0043720 .....  
 EVM0054855 .....  
 PtERFB1\_1 .....  
 EVM0055399 .....  
 EVM0013798 .....  
 EVM0019343 .....  
 EVM0042467 .....  
 EVM0054100 .....  
 EVM0006682 .....  
 EVM0049140 .....  
 EVM0053305 .....  
 EVM0016530 K .....  
 EVM0041629 .....  
 EVM0000535 .....  
 EVM0048064 .....  
 EVM0049898 .....  
 EVM0052258 .....  
 AT1G28370\_B1 .....  
 EVM0023162 .....  
 EVM0046939 .....  
 EVM0008900 .....  
 EVM0029866 .....  
 EVM0045686 .....  
 EVM0018037 .....  
 EVM0003762 .....  
 AT1G50640\_B1 .....  
 EVM0039676 .....  
 EVM0032830 .....  
 EVM0051611 .....  
 EVM0004204 .....  
 EVM0001371 .....  
 EVM0049397 .....  
 EVM0018988 .....  
 PtERFB6\_16 .....  
 EVM0000006 .....  
 EVM0044977 .....  
 EVM0009817 .....  
 EVM0020531 .....  
 EVM0030192 .....  
 EVM0040670 .....  
 EVM0013811 .....  
 AT4G17490\_B3 .....  
 EVM0041820 .....  
 PtERFB3\_3 .....  
 EVM0036702 .....  
 EVM0049755 .....  
 EVM0006972 .....  
 EVM0055475 .....  
 EVM0054964 .....  
 EVM0019924 .....  
 EVM0055695 .....  
 EVM0012873 .....  
 EVM0036069 .....  
 EVM0002921 .....  
 EVM0040715 .....  
 EVM0025220 .....  
 EVM0054439 .....  
 EVM0017235 .....  
 EVM0014312 .....  
 EVM0006944 .....  
 EVM0041453 .....  
 EVM0001248 .....

|              |            |
|--------------|------------|
| EVM0008128   | .....      |
| EVM0040250   | .....      |
| EVM0035905   | .....      |
| EVM0025231   | .....      |
| EVM0017086   | .....      |
| EVM0045763   | .....      |
| EVM0038648   | .....      |
| EVM0022031   | .....      |
| EVM0045225   | .....      |
| EVM0045646   | .....      |
| EVM0008755   | .....      |
| EVM0018983   | .....      |
| EVM0023703   | .....      |
| AT2G31230_B3 | .....      |
| EVM0049532   | .....      |
| EVM0029622   | .....      |
| EVM0012743   | .....      |
| EVM0009409   | .....      |
| EVM0052364   | .....      |
| EVM0027771   | .....      |
| EVM0005349   | .....      |
| EVM0035055   | .....      |
| EVM0012041   | .....      |
| EVM0028403   | .....      |
| EVM0052605   | .....      |
| EVM0045883   | .....      |
| EVM0037606   | .....      |
| PtERFB3_12   | .....      |
| EVM0054822   | .....      |
| EVM0024412   | .....      |
| EVM0030239   | .....      |
| EVM0046641   | .....      |
| EVM0006603   | .....      |
| EVM0006649   | .....      |
| EVM0054070   | .....      |
| EVM0052610   | .....      |
| EVM0057308   | .....      |
| EVM0053966   | .....      |
| EVM0031305   | .....      |
| EVM0017641   | .....      |
| EVM0028978   | .....      |
| EVM0054684   | .....      |
| EVM0017324   | .....      |
| EVM0023232   | .....      |
| EVM0055941   | .....      |
| EVM0044966   | .....      |
| EVM0039499   | .....      |
| AT3G16770_B2 | .....      |
| AT2G47520_B2 | .....      |
| EVM0044386   | .....      |
| EVM0020075   | .....      |
| EVM0034491   | .....      |
| EVM0026277   | .....      |
| PtERFB4_1    | .....      |
| EVM0017998   | .....      |
| EVM0040725   | .....      |
| EVM0032029   | .....      |
| EVM0013578   | .....      |
| EVM0013502   | .....      |
| EVM0031724   | .....      |
| AT5G61890_B4 | .....      |
| EVM0023217   | .....      |
| EVM0030954   | .....      |
| EVM0047172   | .....      |
| EVM0000045   | .....      |
| EVM0004610   | .....      |
| EVM0001106   | .....      |
| EVM0002769   | .....      |
| EVM0011459   | .....      |
| EVM0043678   | .....      |
| AT2G33710_B4 | .....      |
| EVM0051566   | .....      |
| EVM0057361   | .....      |
| EVM0015843   | .....      |
| EVM0034620   | .....      |
| EVM0031168   | .....      |
| EVM0024472   | .....      |
| EVM0045726   | .....      |
| EVM0022896   | .....      |
| PtERFB5_5    | .....      |
| EVM0049667   | .....      |
| AT4G27950_B5 | .....      |
| EVM0012647   | .....      |
| EVM0015330   | .....      |
| PtERFB5_7    | .....      |
| EVM0043703   | .....      |
| EVM0017733   | .....      |
| EVM0001609   | .....      |
| EVM0054355   | .....      |
| EVM0044712   | .....      |
| EVM0026052   | .....      |
| EVM0041252   | .....      |
| AT2G46310_B5 | .....      |
| EVM0013188   | .....      |
| EVM0015672   | .....      |
| EVM0051058   | .....      |
| EVM0018299   | .....      |
| AT3G16280_A4 | .....      |
| EVM0040155   | .....      |
| EVM0028452   | .....      |
| EVM0034096   | .....      |
| EVM0053799   | .....      |
| EVM0032021   | .....      |
| PtDREBA4_17  | SA .....   |
| EVM0042411   | .....      |
| EVM0021344   | .....      |
| EVM0018160   | .....      |
| EVM0001696   | .....      |
| EVM0005032   | .....      |
| EVM0055308   | .....      |
| EVM0007023   | .....      |
| EVM0005644   | .....      |
| EVM0000005   | .....      |
| EVM0029808   | .....      |
| EVM0004638   | .....      |
| EVM0026062   | .....      |
| EVM0040623   | .....      |
| PtDREBA1_3   | S .....    |
| EVM0052580   | .....      |
| EVM0044116   | .....      |
| EVM0009316   | .....      |
| EVM0013573   | .....      |
| EVM0014688   | .....      |
| EVM0032370   | .....      |
| AT4G25480_A1 | .....      |
| AT4G25490_A1 | .....      |
| EVM0018598   | .....      |
| EVM0057013   | .....      |
| EVM0024365   | .....      |
| EVM0006672   | .....      |
| EVM0004316   | .....      |
| EVM0044087   | .....      |
| EVM0010374   | .....      |
| EVM0015962   | .....      |
| EVM0021255   | .....      |
| EVM0054778   | .....      |
| EVM0000771   | .....      |
| EVM0050604   | .....      |
| PtDREBA4_1   | GA .....   |
| EVM0042416   | .....      |
| EVM0006866   | .....      |
| EVM0056353   | .....      |
| EVM0016569   | .....      |
| EVM0005180   | .....      |
| EVM0002852   | GAKL ..... |

EVM0040690 .....  
EVM0025179 .....  
EVM0032428 .....  
EVM0008628 .....  
EVM0052641 .....  
EVM0034397 .....  
EVM0031973 .....  
AT1G01250\_A4 .....  
EVM0044050 .....  
EVM0006666 .....  
EVM0027008 .....  
EVM0018678 .....  
EVM0029243 .....  
EVM0016157 .....  
EVM0003861 .....  
EVM0051790 .....  
EVM0035105 .....  
EVM0018696 .....  
PtDREBA5\_7 .....  
EVM0055116 .....  
EVM0024690 .....  
EVM0037879 .....  
EVM0033660 .....  
AT1G44830\_A5 .....  
AT1G77640\_A5 .....  
EVM0001548 .....  
EVM0022064 .....  
EVM0001082 .....  
EVM0046201 .....  
EVM0026318 .....  
EVM0020349 .....  
EVM0050804 .....  
EVM0049893 .....  
EVM0053591 .....  
PtDREBA5\_1 ..... S .....  
EVM0029410 .....  
EVM0023642 .....  
EVM0002257 .....  
EVM0049295 ..... SATFNFP .....  
EVM0013555 .....  
EVM0017689 .....  
EVM0047653 .....  
EVM0000172 .....  
EVM0055887 .....  
EVM0042752 .....  
EVM0035890 .....  
EVM0018103 ..... YAR .....  
PtDREBA2\_6 .....  
AT5G05410\_A2 .....  
AT2G40340\_A2 .....  
EVM0057140 .....  
EVM0009348 .....  
EVM0045295 .....  
EVM0001533 .....  
EVM0052698 .....  
EVM0033385 .....  
EVM0004890 .....  
EVM0032156 ..... RA .....  
PtDREBA3\_1 .....  
EVM0025370 .....  
EVM0049616 .....  
AT2G40220\_A3 .....  
EVM0038704 .....  
EVM0014537 .....  
EVM0015466 .....  
EVM0000460 .....  
EVM0013126 .....  
EVM0008654 .....  
EVM0029842 .....  
EVM0043629 .....  
EVM0003769 .....  
EVM0044805 .....  
AT4G39780\_A6 .....  
EVM0049776 .....  
AT1G78080\_A6 .....  
EVM0055401 .....  
EVM0028773 .....  
EVM0051729 .....  
EVM0025018 .....  
EVM0030182 .....  
EVM0021270 .....  
EVM0038570 .....  
PtDREBA6\_7 .....  
EVM0023183 .....  
EVM0051919 .....  
EVM0011072 ..... RAR .....  
PtDREBA2\_12 .....  
EVM0017041 .....  
EVM0054250 .....  
EVM0019845 .....  
EVM0009928 .....  
EVM0039635 .....  
EVM0034803 .....  
EVM0056893 .....  
EVM0057138 .....  
EVM0056869 .....  
EVM0037206 .....  
EVM0008598 .....  
EVM0019323 .....  
EVM0045980 .....  
EVM0004107 .....  
EVM0028845 .....  
AT1G15360\_B6 .....  
EVM0036425 .....  
EVM0042153 .....  
EVM0002653 .....  
EVM0002622 .....  
AT2G20350\_B6 .....  
EVM0039609 .....  
PtRAV\_1 .....  
EVM0043216 .....  
EVM0033748 .....  
EVM0003611 .....  
AT1G25560\_RAV .....  
EVM0030767 ..... DLH .....  
EVM0043812 ..... DLHRN .....  
EVM0029476 .....  
EVM0003379 .....  
EVM0002934 ..... E .....  
EVM0036226 .....  
Ptso1 .....  
At4g13040\_sol ..... E .....  
consensus>50 .....
